# Supplementary material for: Cobalt and zinc nanoparticles from pyrolysis of their MOF precursors exhibiting potent organophosphorus hydrolase-mimicking activities
Source: Royal Society of Chemistry journal article supplement (doi:10.1039/d4cc02170c), 2024-01-01
Supplement: d4cc02170c1.pdf [file d4cc02170c1.pdf]

## Supporting Information for

### Cobalt and zinc nanoparticles from pyrolysis of their MOF precursors exhibiting potent organophosphorus hydrolase-mimicking activities

Qiongfang Zhou, Rongqiu Yan, Yu Zhang and Chenghong Lei\*

*Guilin University of Technology, College of Chemistry and Bioengineering, Guilin, Guangxi 541006, China*

### Experimental notes

2-methylimidazole was obtained from *Macklin* (Shanghai) and Imidazolate-2-carboxaldehyde from *Yuanye Bio-Technology* (Shanghai).  $\text{Co}(\text{NO}_3)_2 \cdot 6\text{H}_2\text{O}$  was purchased from *InnoChem* (Beijing) and  $\text{Zn}(\text{CH}_3\text{COO})_2 \cdot 2\text{H}_2\text{O}$  from *Energy Chemical* (Shanghai). PM was purchased from *Titan Scientific* (Shanghai). Paraoxon was purchased from *Cato* (Guangzhou). EPN was purchased from *Putian Tongchuang* (Beijing). All solvents and reagents were used as purchased without further purification.

ZIF-67 and the resulting  $\text{Co}@\text{NOC}$  were synthesized based on the modified procedures.<sup>1,2</sup> 2.3 g of 2-methylimidazole and 1.0 g of  $\text{Co}(\text{NO}_3)_2 \cdot 6\text{H}_2\text{O}$  were dissolved in 35 mL of anhydrous methanol, respectively. The two solutions were mixed and stirred at room temperature ( $22 \pm 1^\circ\text{C}$ ) for 20 h. The purple product was centrifuged and washed several times with anhydrous methanol. It was then dried at  $60^\circ\text{C}$  in a vacuum oven to obtain a purple powder product ZIF-67. The ZIF-67 material was then spread flat in a porcelain boat and put it into a tube furnace. It was then heated to  $800^\circ\text{C}$  under  $\text{N}_2$  (99.999%) atmosphere for 2 h and cooled down to room temperature. Thus, the black product, OPH-mimicking nanozyme, cobalt nanoparticles incorporated in N and O co-doped carbon matrix ( $\text{Co}@\text{NOC}$ ) was obtained.

ZIF-90 were synthesized using the similar procedure reported in the literature.<sup>3</sup> 6 mL of DMF containing 135 mg of  $\text{Zn}(\text{CH}_3\text{COO})_2 \cdot 2\text{H}_2\text{O}$  was added into 6 mL of DMF containing 116 mg of imidazolate-2-carboxaldehyde under vigorous stirring. After stirring for 5 min, 30 mL of DMF was added into the suspension. The solid product was centrifuged, washed with DMF and ethanol several times. It was then dried at  $60^\circ\text{C}$

under vacuum condition to obtain a light brown powder product ZIF-90. The yield for the synthesis of ZIF-90 was about 26%. The ZIF-90 material was then spread flat in a porcelain boat and put it into a tube furnace. It was then heated to 800°C under N<sub>2</sub> atmosphere for 2 h and cooled down to room temperature. Thus, the black product, another OPH-mimicking nanozyme, zinc nanoparticles incorporated in N and O co-doped carbon matrix (Zn@NOC) was obtained.

As a general procedure, in a cuvette containing 1.2 mL of pH 9.0, 0.15 M sodium carbonate buffer, 100 µL of 2 mM paraoxon or EPN or PM and 60 µL of 10.0 mg/mL Co@NOC or Zn@NOC were added and mixed under stirring. The final concentration of Co@NOC, Zn@NOC, ZIF-67 or ZIF-90 was 0.44 mg/mL in the cuvette, while the concentration of the OPC substrate paraoxon or EPN or PM was 147 µM. The mixture was incubated at 25°C or 40°C for 12 min to 6 hours in a shaking incubator, and then centrifuged to collect the supernatant. The incubation was also done with paraoxon or EPN or PM in the working buffer without any added Co@NOC, Zn@NOC, ZIF-67 or ZIF-90 for control experiments of spontaneous hydrolysis. The absorbance of the supernatants was measured at 400 nm for detecting or monitoring the product p-nitrophenol. One unit of the activity of OPH-mimicking nanozyme is defined as the amount of the nanozyme that can hydrolyze 1 nmol of paraoxon or EPN or PM per minute at 40°C and pH 9.0. At least three parallel samples were prepared for each activity measurement for Co@NOC, Zn@NOC or the control.

The X-ray diffraction (XRD) was carried out using a miniflex 600 X-ray diffractometer (Japan Rigaku) at a tube voltage of 40 kV with the Cu K $\alpha$  radiation. TEM images were obtained at a working voltage of 200 kV by a Tecnai F20 transmission electron microscope (USA FEI). The X-ray photoelectron spectroscopy (XPS) was acquired at a working voltage of 12 kV, with a full spectrum scan energy of 150 eV and a narrow spectrum scan energy of 50 eV by a Scientific K-Alpha X-ray photoelectron spectrometer (USA Thermo). All UV-visible spectra were obtained by Agilent UV-8453 spectrophotometer.

## Additional results

### 1. Analysis of XPS and XRD of Co@NOC

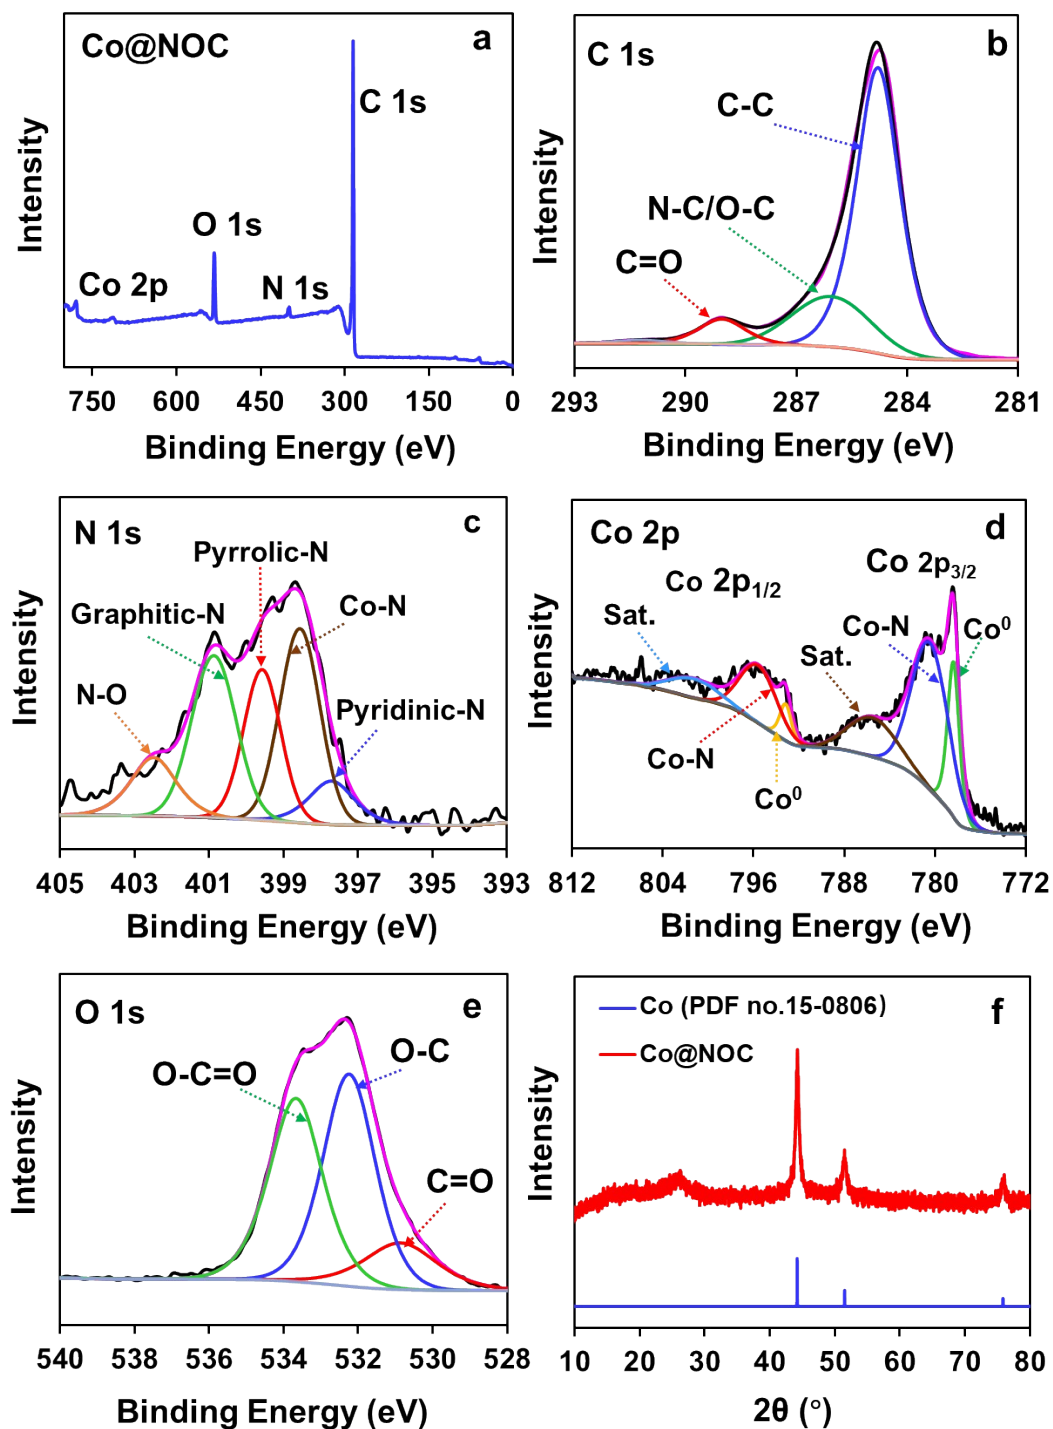

**Figure S1.** (a) XPS spectrum of Co@NOC; (b) XPS spectrum of C 1s; (c) XPS spectrum of N 1s; (d) XPS spectrum of Co 2p; (e) XPS spectrum of O 1s; (f) XRD diffraction pattern of Co@NOC.

The binding states of C, N, O and Co on the Co@NOC nanozyme were analyzed by XPS (**Figure S1a**). The C 1s spectrum shows the peaks corresponding to C-C, C-O/C-N, and C=O, with binding energies of 284.8 eV, 286.1 eV, and 289.0 eV, respectively (**Figure S1b**).<sup>4</sup> The N 1s spectrum displays the peaks corresponding to pyridinic-N, Co-N, pyrrolic-N, graphite-N and N-O, with binding energies of 397.7 eV, 398.6 eV, 399.6 eV, 400.9 eV and 402.5 eV, respectively (**Figure S1c**).<sup>5, 6</sup> The Co 2p spectrum includes the Co 2p<sub>3/2</sub> and Co 2p<sub>1/2</sub> peaks, with binding energies at 778.4 eV and 793.2 eV, respectively (**Figure S1d**). The peaks at 780.5 eV and 795.6 eV are attributed to Co-N resulted from Co 2p<sub>3/2</sub> and Co 2p<sub>1/2</sub>, respectively (**Figure S1d**). In addition, there exhibits two satellite peaks at 785.68 eV and 797.68 eV resulted from Co 2p<sub>3/2</sub> and Co 2p<sub>1/2</sub>, respectively (**Figure S1d**).<sup>6-8</sup> The O 1s spectrum shows the peaks corresponding to C=O, C-O, O-C=O, with binding energies of 530.9 eV, 532.3 eV, and 533.7 eV (**Figure S1e**).<sup>9</sup> The XRD diffraction pattern shows the diffraction peaks at 44.26°, 52.58°, and 77.76°, corresponding to the (1,1,1), (2,0,0), and (2,2,0) crystal planes of the Co standard card (PDF 15-0806) (**Figure S1f**),<sup>7</sup> indicating that cobalt nanoparticles were formed on the carbon matrix after pyrolysis of ZIF-67. The diffraction peak observed at 25.56° corresponds to the signal of graphitic carbon material (0,0,2).<sup>10</sup>

## 2. TEM images of ZIF-90 and Zn@NOC

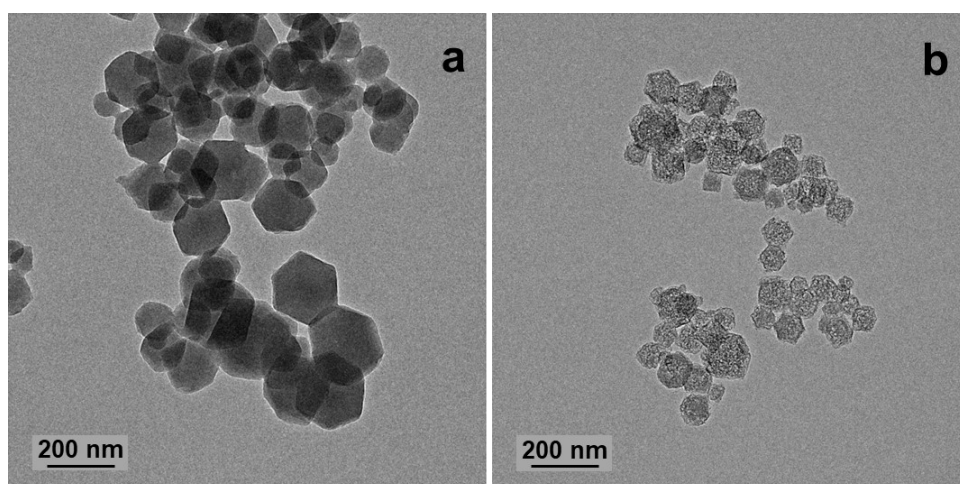



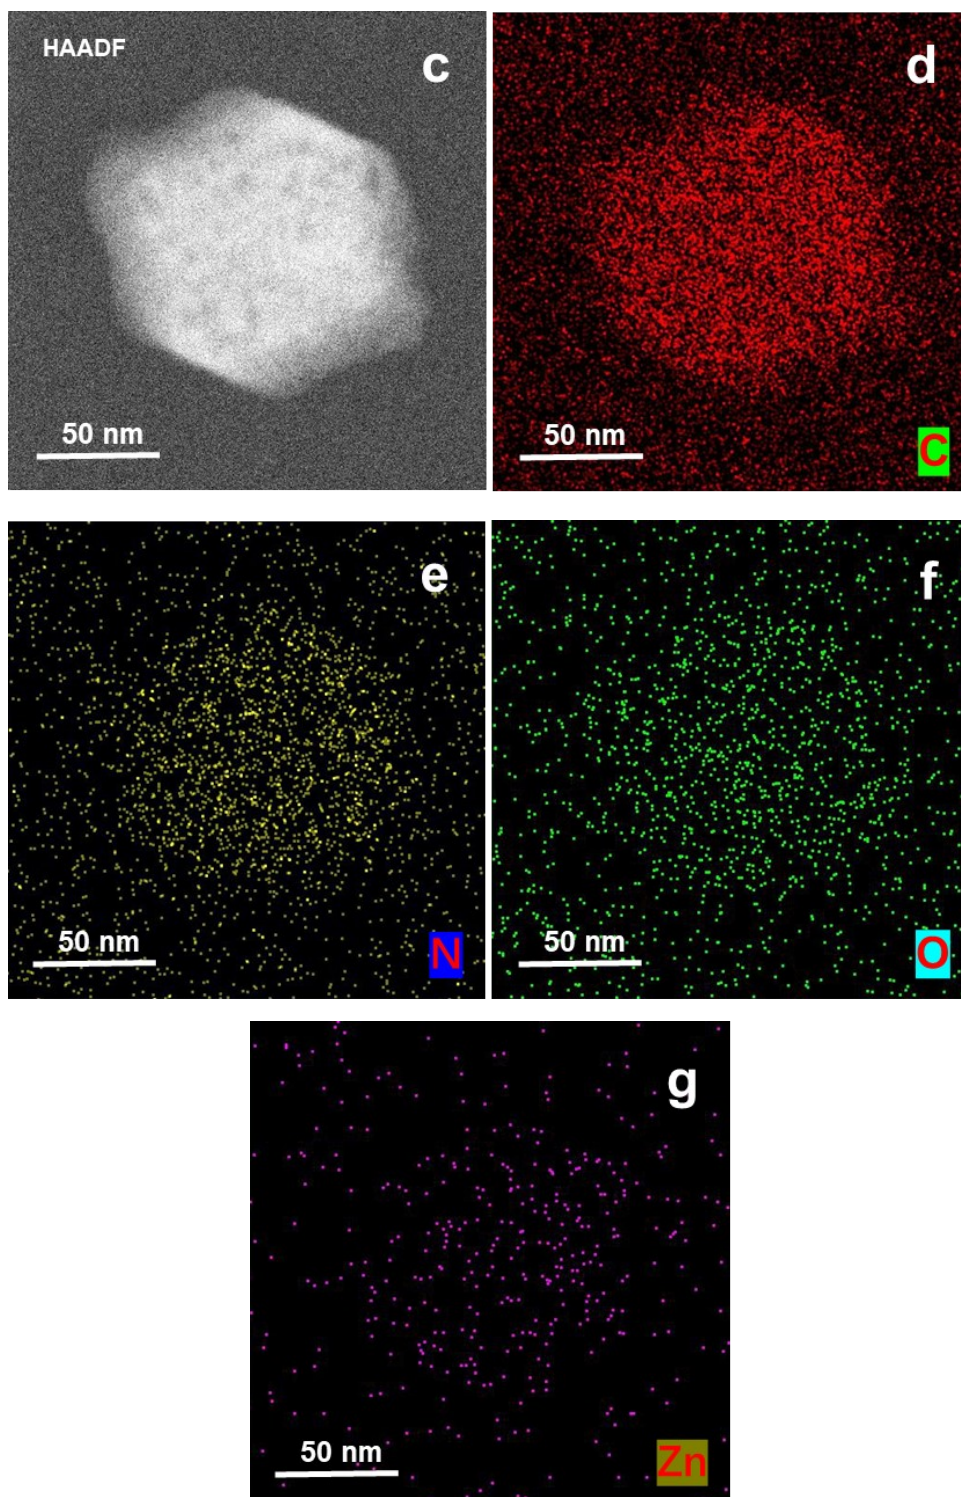

**Figure S2.** (a) TEM image of ZIF-90; (b) TEM image of Zn@NOC resulted from calcination of ZIF-90 under N<sub>2</sub> atmosphere at 800°C; (c) HAADF-TEM image of the Zn@NOC particle; (d-g) EDS elemental dot mappings of C, N, O and Zn, respectively for Zn@NOC.

### 3. Effects of pH on hydrolysis of paraoxon and EPN when incubated with Co@NOC in the working buffer

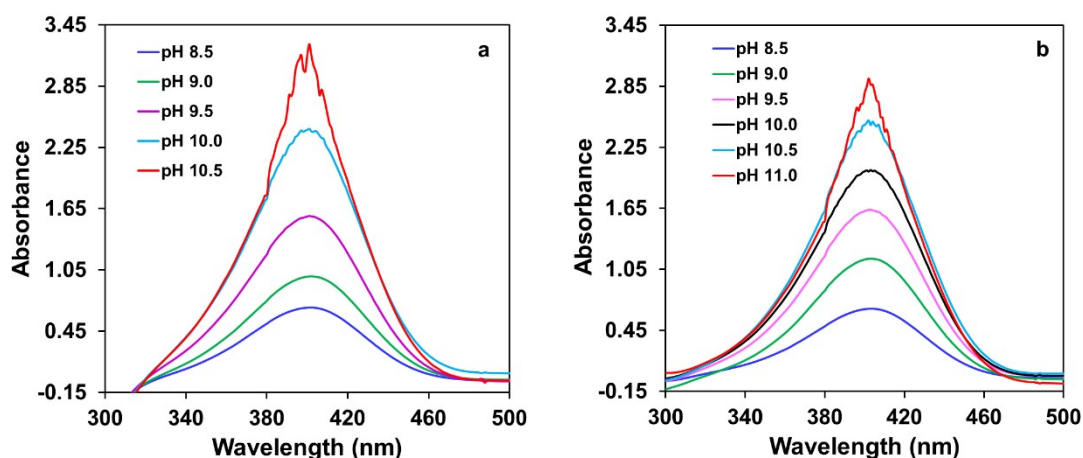

**Figure S3.** UV-vis spectra of the supernatants after incubation of paraoxon (a) and EPN (b) with Co@NOC at 40°C for 12 min in 0.15 M sodium carbonate at different pH values. The hydrolyzed product p-nitrophenol of paraoxon and EPN was monitored at 400 nm. [Co@NOC]: 0.44 mg/mL; [Paraoxon] = [EPN]: 147  $\mu$ M.

### 4. UV-vis spectra of the supernatants after incubation of paraoxon and EPN with ZIF-67 and Co@NOC at 25°C

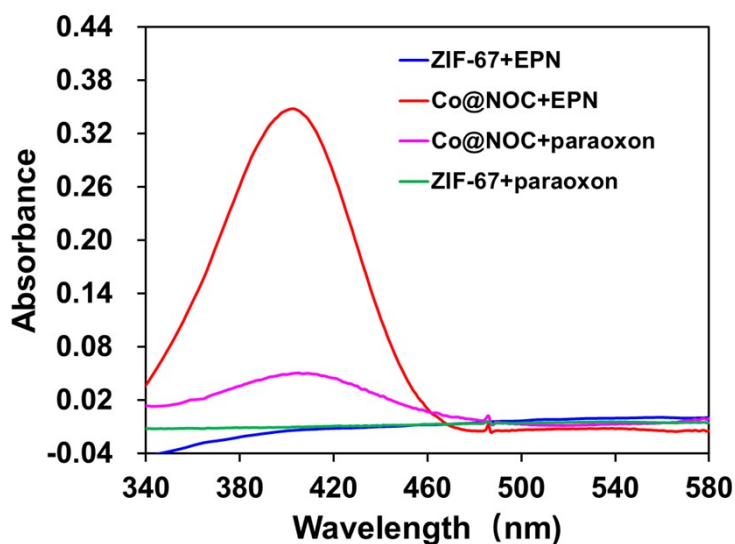

**Figure S4.** UV-vis spectra of the supernatants after incubation of paraoxon and EPN with ZIF-67 and Co@NOC at 25°C for 6 min. Buffer: pH, 9.0, 0.15 M sodium carbonate; [Co@NOC]: 0.44 mg/mL; [Paraoxon] = [EPN]: 147  $\mu$ M.

## 5. Initial kinetic reaction progresses of Co@NOC and Zn@NOC with paraoxon, EPN and PM at 40°C

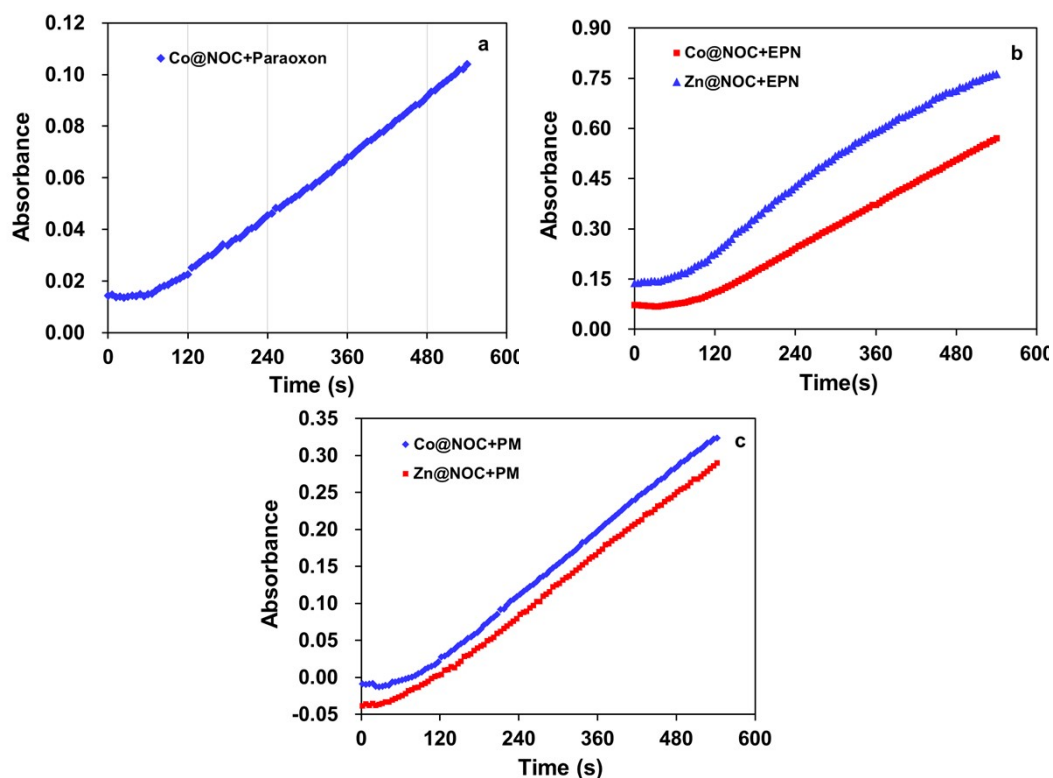

**Figure S5.** Initial kinetic reaction progresses of Co@NOC with paraoxon (a), Co@NOC and Zn@NOC with PM (b), Co@NOC and Zn@NOC with PM (c) at 40°C. Buffer: pH, 9.0, 0.15 M sodium carbonate; [Co@NOC] = [Zn@NOC]: 0.44 mg/mL; [Paraoxon] = [EPN] = [PM]: 147  $\mu$ M.

## 6. UV-vis spectra of the supernatants after incubation of EPN with ZIF-67 and ZIF-90 at 40°C.

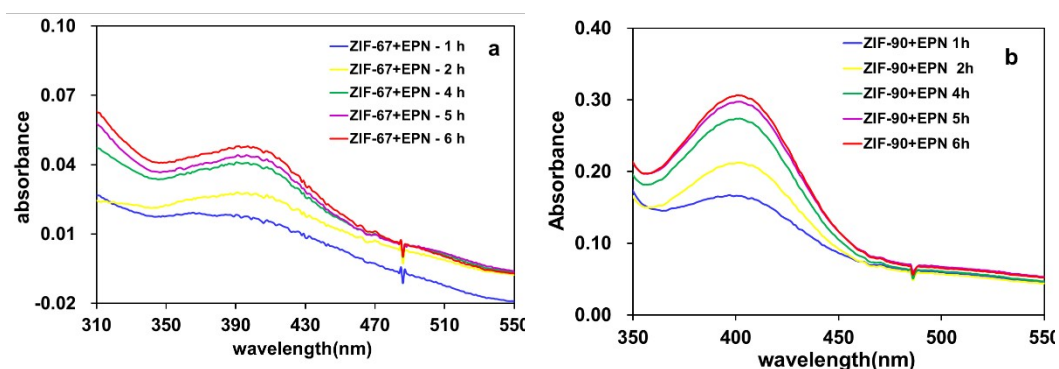

**Figure S6.** UV-vis spectra of the supernatants after incubation of EPN with ZIF-67 (a) and ZIF-90 (b) at 40°C for up to 6 hours. Buffer: pH, 9.0, 0.15 M sodium carbonate; [ZIF-67] = [ZIF-90] = 0.44 mg/mL; [EPN]: 147  $\mu$ M.

## 7. Reusability of Co@NOC and Zn@NOC

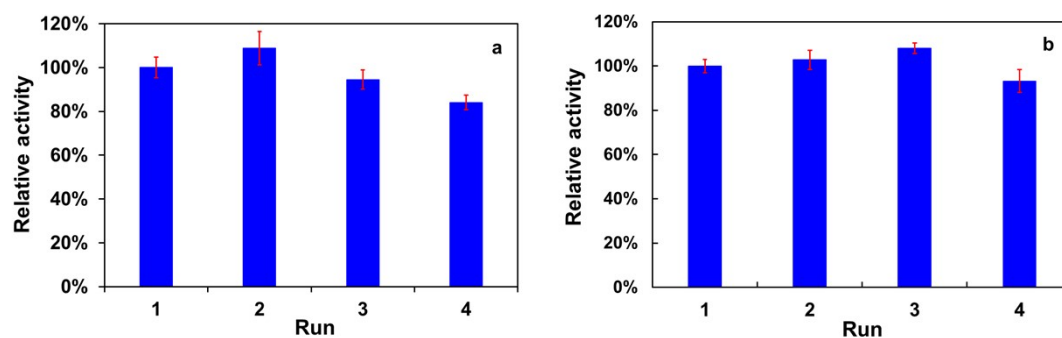

**Figure S7.** Reusability of Co@NOC and Zn@NOC with PM as the substrate. Co@NOC (a) and Zn@NOC (b) was repeatedly incubated with PM after each use in pH, 9.0, 0.15 M sodium carbonate at 40°C for 12 min. [Co@NOC] = [Zn@NOC]: 0.44 mg/mL; [PM]: 147  $\mu$ M.

## References

1. Meng, W., Wen, Y., Dai, L., He, Z. & Wang, L. A novel electrochemical sensor for glucose detection based on Ag@ZIF-67 nanocomposite. *Sensors and Actuators B: Chemical* **260**, 852-860 (2018).
2. Li, C., Meng, Y., Yang, S. & Li, H. ZIF-67 Derived Co/NC Nanoparticles Enable Catalytic Leuckart-type Reductive Amination of Bio-based Carbonyls to *N*-Formyl Compounds. *Chemcatchem* **13**, 5166-5177 (2021).
3. Fu, T. et al. Zeolitic Imidazolate Framework-90 Nanoparticles as Nanozymes to Mimic Organophosphorus Hydrolase. *Acs Applied Nano Materials* **4**, 3345-3350 (2021).
4. Parkash, A. CTAB-caped Cu nanoparticles doped on zeolitic imidazolate framework-ZIF-67 as bifunctional catalysts for oxygen-reduction and evolution reactions in alkaline media. *Journal of Porous Materials* **28**, 1245-1260 (2021).
5. Zhang, G. et al. One-step conversion from metal-organic frameworks to Co<sub>3</sub>O<sub>4</sub>@N-doped carbon nanocomposites towards highly efficient oxygen reduction catalysts. *Journal of Materials Chemistry A* **2**, 8184-8189 (2014).
6. Liu, Y. et al. Cobalt nanoparticles decorated bamboo-like N-doped carbon nanotube as nanozyme sensor for efficient biosensing. *Journal of Electroanalytical Chemistry* **926**, 116932 (2022).
7. Zhao, J. et al. ZIF-8@ZIF-67 Derived Co/NPHC Catalysts for Efficient and Selective Hydrogenation of Nitroarenes. *Catalysis Letters* **153**, 824-835 (2023).
8. Shu, Y. et al. Isolated Cobalt Atoms on N-Doped Carbon as Nanozymes for Hydrogen Peroxide and Dopamine Detection. *ACS Applied Nano Materials* **4**, 7954-7962 (2021).
9. Chong, S. et al. Nitrogen and Oxygen Co-Doped Porous Hard Carbon Nanospheres with Core-Shell Architecture as Anode Materials for Superior Potassium-Ion Storage. *Small* **18**, 2104296 (2022).
10. Shi, L., Li, Y., Cai, X., Zhao, H. & Lan, M. ZIF-67 derived cobalt-based nanomaterials for electrocatalysis and nonenzymatic detection of glucose: Difference between the calcination atmosphere of nitrogen and air. *Journal of Electroanalytical Chemistry* **799**, 512-518 (2017).
